# Supplementary material for: Landscape-scale water balance monitoring with an iGrav superconducting gravimeter in a field enclosure
Source: Copernicus journal article supplement (doi:10.5194/hess-21-3167-2017), 2017-06-29
Supplement: Supplementary file 1 [file hess-21-3167-2017-supplement.zip]

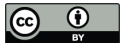

## *Supplement of*

# **Landscape-scale water balance monitoring with an iGrav superconducting gravimeter in a field enclosure**

**Andreas Güntner et al.**

*Correspondence to:* Andreas Güntner ([guentner@gfz-potsdam.de](mailto:guentner@gfz-potsdam.de))

- [hess-21-3167-2017-supplement-title-page.pdf](#)

- [Guentner\\_et\\_al\\_2017](#)

- .git
  - \* COMMIT\_EDITMSG
  - \* FETCH\_HEAD
  - \* HEAD
  - \* ORIG\_HEAD
  - \* config
  - \* description
  - \* hooks
  - \* index
  - \* info
  - \* logs
  - \* objects
  - \* refs
  - \* sourcetreeconfig
- .gitignore
- Data
  - \* DEM
  - \* ForwardModel
  - \* Grav
  - \* HydroMeteo
  - \* HydrusModel
  - \* Optimization
- License.md
- Manuscript

- \* Figures
- Scripts
  - \* DataProcessing
  - \* Figures
  - \* ForwardModel
  - \* HydrusModel
  - \* MatlabLibrary
  - \* Optimization
- readme.md

The copyright of individual parts of the supplement might differ from the CC BY 3.0 License.
